# Supplementary material
Source: Springer Nature journal article supplement (https://www.springermedizin.de/resource/supplementary/12936_2011_1866_MOESM1_ESM.pdf/9541938)

*P. falciparum* msp-1 alleles distribution

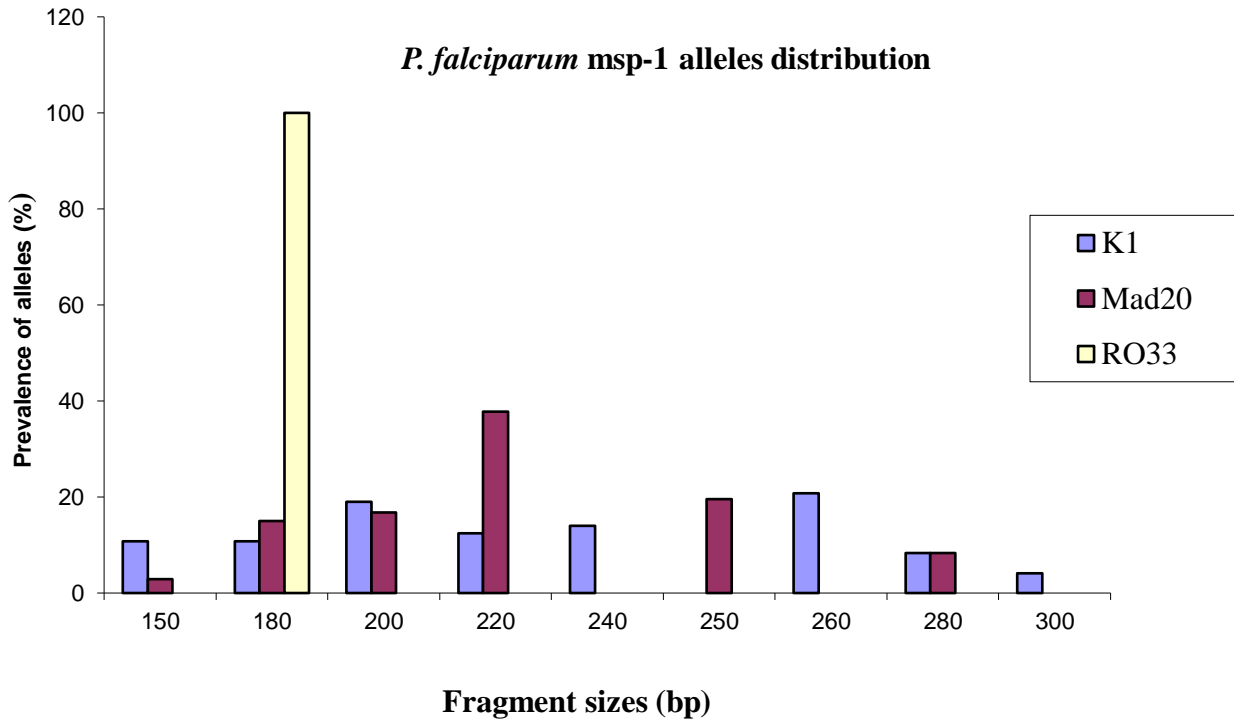

Supplement: MOESM1 [file 9541938]
